# Supplementary material for: The Form of N Supply Determines Plant Growth Promotion by P-Solubilizing Microorganisms in Maize
Source: PubMed Central journal article supplement (PMC6406690; doi:10.3390/microorganisms7020038), 2019-01-29
Supplement: microorganisms-07-00038-s001.pdf [file microorganisms-07-00038-s001.pdf]

**Table 1.** Effects of nitrate (NO<sub>3</sub>) versus stabilized ammonium (Stab. NH<sub>4</sub>) fertilization on shoot growth and yield formation of different crops with and without inoculation with microbial biostimulants (BS).

| Microbial Biostimulant (BS) | Soil/pH/P source                | NO <sub>3</sub> | NO <sub>3</sub> +BS | Stab. NH <sub>4</sub> | Stab. NH <sub>4</sub> +BS | Crop, Culture system | Growth parameter                        | Reference |
|-----------------------------|---------------------------------|-----------------|---------------------|-----------------------|---------------------------|----------------------|-----------------------------------------|-----------|
| Proradix                    | pH 7.6 Rock-P<br>(Exp.2, limed) | 9.3 c           | 14.5 b              | 16.9 b                | 20.4 a                    | Maize                | Shoot FW (g)                            | [1]       |
| Proradix                    | Silty loam,                     | 4.3 b           | 4.6 b               | 8.1 a                 | 9.6 a                     | Maize (Pot)          | Shoot DM (g)                            | [2]       |
| FZB42                       | pH 7.0 Rock-P                   | 1.8 c           | 2.0 bc              | 2.9 b                 | 4.1 a                     | Maize (Pot)          | Shoot DM (g)                            | [3]       |
| Combi-B                     | (Exp.3)                         | 2.0 b           | 3.2 b               | 4.1 ab                | 5.8 a                     | Maize (Pot)          | Shoot DM (g)                            | [4]       |
| Proradix                    | Clay-loam,<br>pH 6.8, Rock-P    |                 | 10.4 c              | 13.0 b                | 15.4 a                    | Maize (Pot)          | Shoot DM                                | [1]       |
| Proradix                    | Silty loam,                     | 12.5 b          | 13.5 b              | 11.4 b                | 15.4 a                    | Wheat (Pot)          | Grain DM                                | [1]       |
| <i>P. mucilaginosus</i>     | pH 6.4 Rock-P                   | 12.5 b          |                     | 11.4 b                | 15.1 a                    |                      | Grain DM                                | [1]       |
| FZB42                       | Silty sand,<br>pH 5.6 Rock-P    |                 |                     | 7.3 b                 | 10.0 a                    | Tomato (Pot)         | Shoot DM                                | [5]       |
| CRENEL                      | Silty loam,<br>pH 5.7 starter P | 2.1 b           | 2.3 b               | 2.6 b                 | 3.4 a                     | Maize (Pot)          | Shoot DM                                | [6]       |
| CRENEL                      | 95% Sand,<br>pH 7.9 No P        |                 |                     | 300 b<br>17.2 b       | 640 a<br>35.8 a           | Tomato (field)       | Shoot FW<br>Yield (t ha <sup>-1</sup> ) | [7]       |

Proradix = *Pseudomonas* sp. DMSZ13134 (Sourcon Padena, Tübingen, Germany); FZB42 = *Bacillus amyloliquorfaciens* FZB42; *Paenibacillus mucilaginosus* (ABITEP, Berlin Germany), CRENEL = Microbial Consortia Product (Eurochem-Agro., Mannheim, Germany); Combi-B: FZB42-*Trichoderma harzianum* OMG16 combination with Zn and Mn (Institute of Bioanalytical Sciences, Bernburg, Germany).

## Reference

1. Nkebiwe P. M. Fertilizer placement and the potential for its combination with bio-effectors to improve crop nutrient acquisition and yield. Dissertation, Universität Hohenheim, Stuttgart, Germany, 20 December 2017.
2. Gomez-Genao N.J. Factors determining N-form dependent efficiency of microbial bio-effectors in maize. Master Thesis, Universität Hohenheim, Stuttgart, Germany, 2017.
3. Mpanga, I.K. Unpublished work. Universität Hohenheim, Stuttgart, Germany.
4. Hsu C.T. Soil type-dependent expression of PGPR effects in maize as affected by the form of nitrogen fertilization. Master Thesis, Universität Hohenheim, Stuttgart, Germany, 2018.
5. Mpanga, I.K.; Dapaah, H.K.; Geistlinger, J.; Ludewig, U.; Neumann, G. Soil Type-Dependent Interactions of P-Solubilizing Microorganisms with Organic and Inorganic Fertilizers Mediate Plant Growth Promotion in Tomato. *Agronomy* **2018**, *8*, 213.
6. Sittinger M. Effects of a microbial consortia product on the growth of maize (*Zea mays*). Master Thesis, Universität Hohenheim, Stuttgart, Germany, 2018.
7. Bradacova K. et al. Microbial Consortia versus Single-Strain Inoculants: an Advantage in PGPR-assisted Tomato Production? *Agronomy*, submitted.

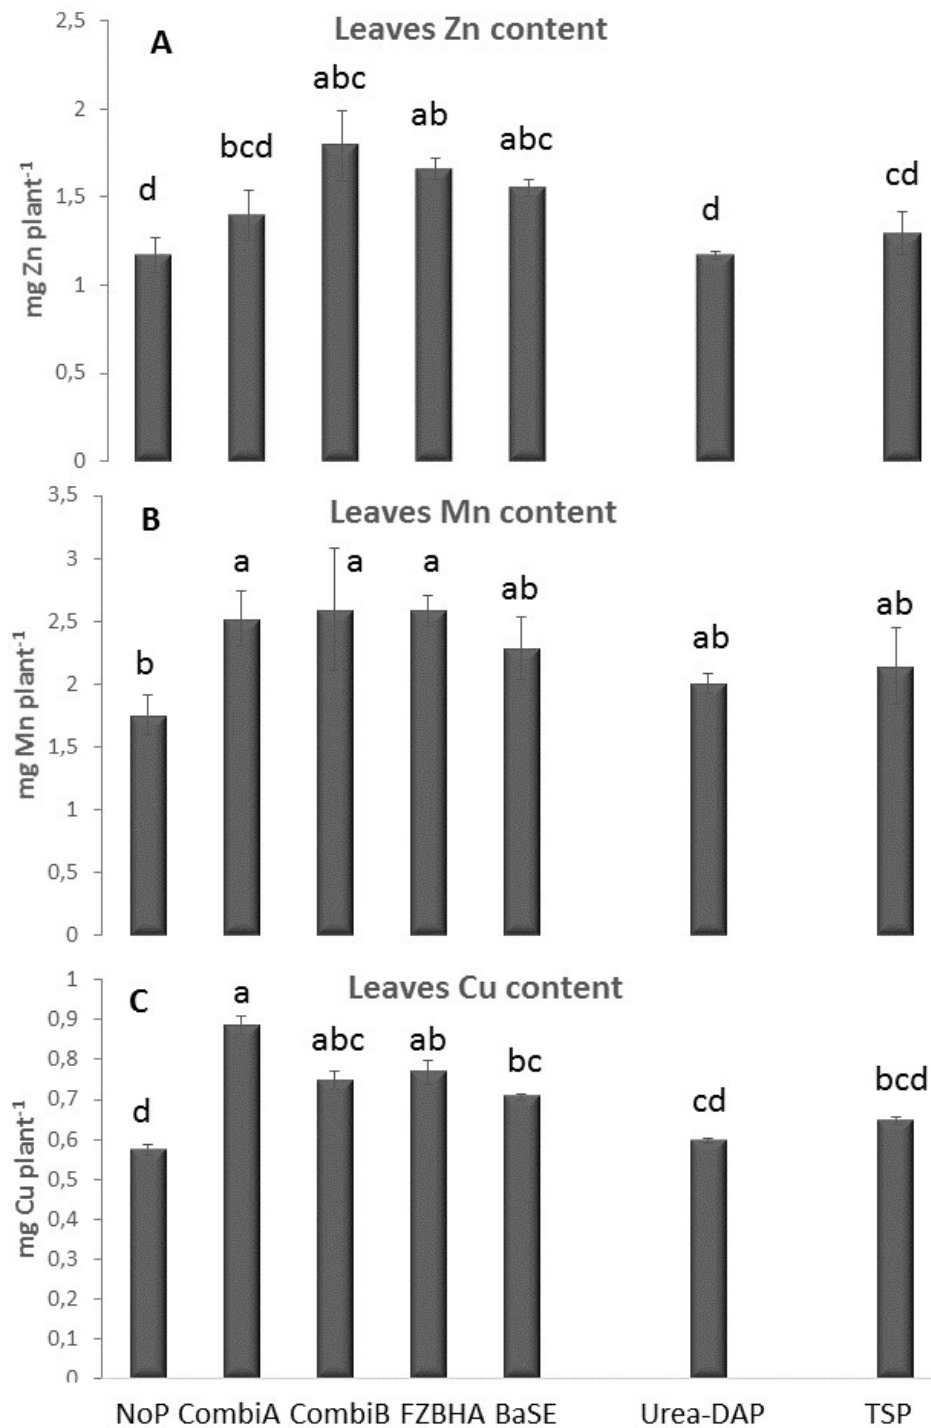

**Figure S1.** Micronutrient shoot accumulation during early growth (42 DAS) of Maize (cv Limagrain 30.600) on an alkaline clay loam soil (Vertic Xerofluvent, pH 8.6) with and without (NoP) P fertilization in form of triple superphosphate (TSP) or di-ammonium phosphate (DAP). Nitrogen was supplied as DMPP-stabilized ammonium sulfate or non-stabilized Urea-DAP. In the PSM variants, phosphate fertilization was replaced by selected PSM products: Combifactor-A (CombiA), Combifactor-B (CombiB), *Bacillus amyloliquefaciens* FZB42 + humic acids (FZBHA), *B. amylolique-faciens* + seaweed extract (BaSE). Means of four replicates. Different letters indicate significant differences; One way ANOVA ( $p < 0.05$ ).
